# Supplementary material for: An Artificial Intelligence-Based Alarm Strategy Facilitates Management of Acute Myocardial Infarction
Source: MDPI journal article supplement (doi:10.3390/jpm11111149), 2021-11-04
Supplement: s1 [file s1]

**Supplementary table S2** Baseline characteristics of study participants before and after AI-S implantation.

|                        | Before AI-S (N=57) | After AI-S (N=32) | p-value |
|------------------------|--------------------|-------------------|---------|
| Age                    | 59.9±11.9          | 56.2±11.4         | 0.158   |
| Gender(male)           | 49(86.0%)          | 30(93.8%)         | 0.320   |
| BMI                    | 26.0±3.29          | 25.0±5.98         | 0.342   |
| SBP                    | 132.2±26.4         | 134.4±34.8        | 0.744   |
| DBP                    | 81.1±18.1          | 87.4±25.7         | 0.183   |
| Chest pain initially   | 55(96.5%)          | 29(90.6%)         | 0.346   |
| Disease history        |                    |                   |         |
| HTN                    | 28(49.1%)          | 19(59.4%)         | 0.353   |
| DM                     | 24(42.1%)          | 10(31.2%)         | 0.312   |
| HLP                    | 25(43.9%)          | 20(62.5%)         | 0.091   |
| CAD                    | 8(14.0%)           | 3(9.4%)           | 0.740   |
| CKD                    | 8(14.0%)           | 6(18.8%)          | 0.558   |
| Off hours*             | 32(56.1%)          | 16(50.0%)         | 0.577   |
| Vascular access        |                    |                   |         |
| Transradial            | 38(66.7%)          | 22(68.8%)         | 0.841   |
| Infarct related artery |                    |                   |         |
| LAD                    | 32(56.1%)          | 22(68.8%)         | 0.243   |
| RCA                    | 19(33.3%)          | 7(21.9%)          | 0.254   |
| LCx                    | 6(10.5%)           | 2(6.2%)           | 0.706   |

\*Off hour: from 5:00 p.m. to 8:00 a.m, Monday through Friday; Saturday, Sunday and holidays.

Abbreviations: BMI, body mass index; SBP, systolic blood pressure; DBP, diastolic blood pressure; HTN, hypertension; DM, diabetes mellitus; HLP, hyperlipidemia; CAD, coronary artery disease; CKD, chronic kidney disease; LAD, left ascending artery; RCA, right coronary artery; LCx, left circumflex artery.
