# Supplementary material for: An Artificial Intelligence-Based Alarm Strategy Facilitates Management of Acute Myocardial Infarction
Source: MDPI journal article supplement (doi:10.3390/jpm11111149), 2021-11-04
Supplement: s1 [file s1]

**Supplementary Table S3** One-year outcomes of study participants after primary percutaneous coronary intervention with door-to-balloon time  $\leq$  90min.

|                                 | <b>Before AI-S<br/>(N=57)</b> | <b>After AI-S<br/>(N=32)</b> |
|---------------------------------|-------------------------------|------------------------------|
| All-cause mortality* (CV death) | 1(1)                          | 1(1)                         |
| HF hospitalization              | 2                             | 1                            |
| Non-fatal MI                    | 2                             | 0                            |

\*All-cause mortality included CV death.

Abbreviations: AI-S, AI-based alarm strategy; CV, cardiovascular; HF, heart failure; MI, myocardial infarction.
