# Supplementary material for: An Artificial Intelligence-Based Alarm Strategy Facilitates Management of Acute Myocardial Infarction
Source: MDPI journal article supplement (doi:10.3390/jpm11111149), 2021-11-04
Supplement: s1 [file s1]

**Supplementary table S1** Corresponding characteristics in development and prospective validation cohorts.

|                           | Strategy development cohort<br>(n=25,002) | Prospective validation cohort<br>(n=14,296) | p-value |
|---------------------------|-------------------------------------------|---------------------------------------------|---------|
| <b>AMI type</b>           |                                           |                                             | 0.821   |
| STEMI                     | 110(0.4%)                                 | 59(0.4%)                                    |         |
| NSTEMI                    | 125(0.5%)                                 | 66(0.5%)                                    |         |
| not-AMI                   | 24,768(99.1%)                             | 14,171(99.1%)                               |         |
| <b>ED information</b>     |                                           |                                             |         |
| Triage code               |                                           |                                             | 0.937   |
| <i>Levels 1 and 2</i>     | 9,347(37.4%)                              | 5,339(37.3%)                                |         |
| <i>Levels 3, 4, and 5</i> | 15,655 (62.6%)                            | 8,957(62.7%)                                |         |
| Chest pain                |                                           |                                             | 0.928   |
| With                      | 3,320(13.3%)                              | 1,903(13.3%)                                |         |
| Without                   | 21,682(86.7%)                             | 12,393(86.7%)                               |         |
| hsTnI test                |                                           |                                             | 0.551   |
| With                      | 20,486(81.9%)                             | 11,748 (82.2%)                              |         |
| Without                   | 4,516(18.1%)                              | 2,548(17.8%)                                |         |
| <b>Demography</b>         |                                           |                                             |         |
| Gender (male)             | 12,435(49.7%)                             | 7,239(50.6%)                                | 0.085   |
| Age (years)               | 61.9±19.9                                 | 62.6±19.7                                   | 0.001   |
| BMI (kg/m <sup>2</sup> )  | 25.7±118.1                                | 24.7±6.2                                    | 0.483   |
| SBP (mmHg)                | 138.8±27.7                                | 137.2±27.0                                  | <0.001  |
| DBP (mmHg)                | 79.0±17.6                                 | 77.8±17.1                                   | <0.001  |
| <b>Disease history</b>    |                                           |                                             |         |
| AMI                       | 848(3.4%)                                 | 534(3.7%)                                   | 0.075   |
| DM                        | 6,412(25.6%)                              | 3,742(26.2%)                                | 0.250   |
| HTN                       | 9,909(39.6%)                              | 5,666(39.6%)                                | 0.995   |
| HLP                       | 8,055(32.2%)                              | 4,673(32.7%)                                | 0.335   |
| CKD                       | 7,528(30.1%)                              | 4,687(32.8%)                                | <0.001  |

Abbreviations: AMI, acute myocardial infarction; STEMI, ST-elevation myocardial infarction; NSTEMI, non ST-elevation myocardial infarction; hsTnI, high sensitivity troponin I; BMI, body mass index; SBP, systolic blood pressure; DBP, diastolic blood pressure; DM, diabetes mellitus; HTN, hypertension; HLP, hyperlipidemia; CKD, chronic kidney disease.
