# Supplementary material for: An Artificial Intelligence-Based Alarm Strategy Facilitates Management of Acute Myocardial Infarction
Source: J Pers Med. 2021 Nov 4;11(11):1149. doi: 10.3390/jpm11111149 (PMC8623357; doi:10.3390/jpm11111149)
Supplement: Supplementary file 1 [file jpm-11-01149-s001.zip]

Archive with 10 entries (10 files):
- Supplementary figure S1.jpg
- Supplementary figure S2.jpg
- Supplementary figure S3.jpg
- Supplementary figure S4.jpg
- Supplementary figure S5.jpg
- Supplementary figure S6.jpg
- Supplementary material_JPM.pdf
- Supplementary table S1.pdf
- Supplementary table S3.pdf
- Supplementaty table S2.pdf
